# Supplementary material for: Synthesis and properties of substituted (p-aminostyryl)-1-(3-sulfooxypropyl)pyridinium inner salts as a new class of two-photon pumped lasing dyesElectronic supplementary information (ESI) available: synthesis details for compounds 7b, 7c, 8b and 8c. See http://www.rsc.org/suppdata/jm/b3/b307504d/
Source: Royal Society of Chemistry journal article supplement (doi:10.1039/b307504d), 2003-01-01
Supplement: b307504d.doc [file b307504d.doc]

**Synthesis and properties of substituted (p-aminostyryl)-1-(3-sulfooxypropyl)pyridinium inner salts as a new class of two-photon pumped lasing dyes**

Qingdong Zheng, Guang S. He, Tzu-Chau Lin and Paras N. Prasad

# Synthesis details for compound 7b, 7c, 8b and 8c

*Trans-4-{p-[N-methyl-N-(2-acetic acid ethyl ester)amino]styryl}-1-methylpyridinium, iodide* (**7**b)

Compound **3**b (2.09 g, 0.01 mol) and 4-methyl-N-methylpyridinium iodide (2.35 g**,** 0.01 mol)were dissolved in acetonitrile (40 ml). Drops of piperidine were added as catalyst. The solution was heated to 80 ˚C and kept for 24 hours. Then ethyl acetate (20 ml) was added to the mixture. After cooling to room temperature, a red precipitate was filtered and washed with ethyl acetate. By crystallization from ethanol and ethyl acetate (3:1) two times, a red crystalline solid was obtained (2.5 g, yield 66%). Mp: 159-161 ˚C. 1H NMR (DMSO-d6, 500 MHz), δ[ppm]: 8.67 (d, 2H, J=7.0 Hz), 8.05 (d, 2H, J=7.0 Hz), 7.89 (d, 1H, J=16 Hz), 7.58 (d, 2H, J=9.0 Hz), 7.19 (d, 1H, J=16 Hz), 6.76 (d, 2H, J=9.0 Hz), 4.31 (s, 2H), 4.17 (s, 2H), 4.10 (q, 2H, J=7.0 Hz), 3.05 (s, 3H), 1.18 (t, 3H, J=7.0 Hz). Elemental analysis: calcd. For C, 52.07; H, 5.29; N, 6.39%. Found: For C, 51.77; H, 5.35; N, 6.52%. MS m/z (Rel. intensity): 311.2 (M-I-, 100%).

*Trans-4-{p-[N,N-bis(2-hydroxyethyl)amino]styryl}-1-methylpyridinium iodide* **(7c)**

The same procedure as described in the preparation of compound **7**b was used here.

Red crystalline solid, yield 60%, mp: 151-153 °C. 1H NMR (DMSO-d6, 500 MHz), δ[ppm]: 8.66 (d, 2H, J=7.0 Hz), 8.02 (d, 2H, J=7.0 Hz), 7.88 (d, 1H, J=16.5 Hz), 7.54 (d, 2H, J=9.0 Hz ), 7.12 (d, 1H, J=16.5 Hz), 6.78 (d, 2H, J=9.0 Hz), 4.08 (t, 2H, J=5.0 Hz), 4.15 (s, 3H), 3.56 (t, 4H, J=5.5 Hz), 3.50 (t, 4H, J=5.5 Hz). Elemental analysis: calcd. For C, 50.71; H, 5.44; N, 6.57%. Found: For C, 50.95; H, 5.50; N, 6.46%. MS m/z (Rel. intensity): 299.3 (M-I-, 100%).

*Trans-4-{p-[N-methyl-N-(2-acetic acid ethyl ester)amino]styryl}-1-methylpyridinium tosylate* **(8**b**)**

Compound **7**b (0.88 g, 0.002 mol) was dissolved in ethanol (100 ml) and heated to reflux. silver p-toluenesulfonate (0.56 g, 0.002 mol) was added to the solution while stirring. Then the mixture was refluxed for 2 hours. After cooling the silver iodide precipitate was filtered out. Evaporation of the red filtrate produced an orange-red crystalline solid. Crystallization from ethanol and ethyl acetate (3:1) gave compound **8**b (0.69 g, yield: 80%). Mp:179-181 °C. 1H NMR (DMSO-d6, 500 MHz), δ[ppm]: 8.69 (d, 2H, J=7.0 Hz), 8.05 (d, 2H, J=7.0 Hz), 7.89 (d, 1H, J=16 Hz), 7.58 (d, 2H, J=9.0 Hz), 7.46 (d, 2H, J=8.0 Hz), 7.18 (d, 1H, J=16 Hz), 7.10 (d, 2H, J=8.0 Hz), 6.76 (d, 2H, J=9.0 Hz), 4.31 (s, 2H), 4.17 (s, 2H), 4.10 (q, 2H, J=7.0 Hz), 3.05 (s, 3H), 2.27 (s, 3H), 1.18 (t, 3H, J=7.0 Hz). Elemental analysis: calcd. For C, 64.71; H, 6.27; N, 5.80%. Found: C, 64.69; H, 6.35; N, 5.67%. MS m/z (Rel. intensity): 311.2 (M-Tos-, 100%).

*4-{p-[N,N-bis(2-hydroxyethyl)amino]styryl}-1-methylpyridinium tosylate* **( 8**c**)** 8

The same procedure as described in the preparation of compound **8**b was used here.

Orange-red crystalline solid, yield 85%, mp 174-176 °C. 1H NMR (DMSO-d6, 500 MHz), δ[ppm]: 8.65 (d, 2H, J=7.0 Hz), 8.01 (d, 2H, J=7.0 Hz), 7.87 ( d, 1H, J=16 Hz), 7.54 (d, 2H, J=9.0 Hz), 7.46 (d, 2H, J=8.0 Hz), 7.12 (d, 1H, J=16 Hz), 7.10 (d, 2H, J=8.0 Hz), 6.78 (d, 2H, J=9.0 Hz), 4.81 (t, 2H, J=5.0 Hz), 4.15 ( s, 3H), 3.56 ( t, 4H, J=5.5 Hz ), 3.50 (t, 4H, J=5.5 Hz), 2.27 (s, 3H). Elemental analysis: calcd. For C, 63.81; H, 6.43; N, 5.95%. Found: For C, 63.54; H, 6.41; N, 5.89%. MS m/z (Rel. intensity): 299.3 (M-Tos-, 100%).
